# Supplementary material
Source: PubMed Central journal article supplement (PMC4093852)
Supplement: JVI.00088-14_zjv999099006so1.pdf [file JVI.00088-14_zjv999099006so1.pdf]

SUPPLEMENTARY DATA

TABLE S1.

LOCATIONS AND SAMPING DATES OF EV VARIANTS

| <b>Collection site</b> | <b>Pos. /tested</b> | <b>Type (number of samples)</b>  | <b>Collection date</b> |
|------------------------|---------------------|----------------------------------|------------------------|
| CPOV                   | 22/23               | SA5 (1), Type 1 (5), Type 2 (2)  | 11/2007                |
|                        | 11/12               | 3336 (1), Type 4 (1), Type 5 (1) | 05/2008                |
| CPML                   | 2/3                 | Not determined                   | 12/2007                |
|                        | 52/55               | Type 1 (9), Type 5 (7)           | 02/2008                |
| DJ                     | 9/9                 | Type 3 (1), H1 (4)               | 04/2009                |
| LM                     | 6/6                 | Type 4 (1), B110 (3)             | 11/2006                |
| CPGR                   | 2/2                 | Not determined                   | 11/2011                |
|                        | 2/2                 | Type 2 (1)                       | 01/2012                |
| GR                     | 1/1                 | Type 2 (1)                       | 03/2007                |
| EK                     | 1/1                 | Type 2 (1)                       | 06/2010                |
| CPMV                   | 1/1                 | Not determined                   | 12/2011                |

TABLE S2.

## SCREEN RESULTS AND GENBANK ACCESSION NUMBERS

| Sample Code | Host species                | Collection Site | Site code | Collection Date | 5'NCR | VP4 | VP4 Acc.No. | VP1 Acc.No. | CG Acc.No. |
|-------------|-----------------------------|-----------------|-----------|-----------------|-------|-----|-------------|-------------|------------|
| 1962        | <i>Mandrillus sphinx</i>    | Lomie           | LM        | 27/11/2006      | +     | +   | KJ420646    | KJ420744    |            |
| 1963        | <i>Mandrillus sphinx</i>    | Lomie           | LM        | 27/11/2006      | +     | +   | KJ420648    | KJ420737    |            |
| 1964        | <i>Mandrillus sphinx</i>    | Lomie           | LM        | 27/11/2006      | +     | -   |             |             |            |
| 1965        | <i>Mandrillus sphinx</i>    | Lomie           | LM        | 27/11/2006      | +     | +   | KJ420649    | KJ420738    |            |
| 1966        | <i>Mandrillus sphinx</i>    | Lomie           | LM        | 27/11/2006      | +     | +   | KJ420645    | KJ420739    |            |
| 2807        | <i>Mandrillus sphinx</i>    | Campo Oveng     | CP-OV     | 11/11/2007      | +     | +   | KJ420654    | KJ420718    |            |
| 2808        | <i>Mandrillus sphinx</i>    | Campo Oveng     | CP-OV     | 11/11/2007      | +     | +   | KJ420655    |             |            |
| 2809        | <i>Mandrillus sphinx</i>    | Campo Oveng     | CP-OV     | 11/11/2007      | +     | +   | KJ420656    |             |            |
| 2811        | <i>Mandrillus sphinx</i>    | Campo Oveng     | CP-OV     | 11/11/2007      | +     | +   | KJ420658    | KJ420720    |            |
| 2798        | <i>Mandrillus sphinx</i>    | Campo Oveng     | CP-OV     | 11/11/2007      | +     | -   |             |             |            |
| 2799        | <i>Mandrillus sphinx</i>    | Campo Oveng     | CP-OV     | 12/11/2007      | +     | +   | KJ420650    |             |            |
| 2801        | <i>Cercocebus torquatus</i> | Campo Oveng     | CP-OV     | 09/11/2007      | +     | -   |             |             |            |
| 2803        | <i>Mandrillus sphinx</i>    | Campo Oveng     | CP-OV     | 11/11/2007      | +     | +   | KJ420651    |             |            |
| 2804        | <i>Mandrillus sphinx</i>    | Campo Oveng     | CP-OV     | 11/11/2007      | +     | +   | KJ420652    | KJ420746    |            |
| 2805        | <i>Mandrillus sphinx</i>    | Campo Oveng     | CP-OV     | 11/11/2007      | +     | +   | KJ420653    | KJ420726    |            |
| 2810        | <i>Mandrillus sphinx</i>    | Campo Oveng     | CP-OV     | 11/11/2007      | +     | +   | KJ420657    | KJ420721    |            |
| 2812        | <i>Mandrillus sphinx</i>    | Campo Oveng     | CP-OV     | 11/11/2007      | +     | +   | KJ420659    |             |            |
| 2813        | <i>Mandrillus sphinx</i>    | Campo Oveng     | CP-OV     | 11/11/2007      | +     | +   | KJ420660    |             |            |
| 2814        | <i>Mandrillus sphinx</i>    | Campo Oveng     | CP-OV     | 11/11/2007      | +     | +   | KJ420661    |             |            |
| 2815        | <i>Mandrillus sphinx</i>    | Gribi           | GR        | 28/03/2007      | +     | +   |             |             | KJ420747   |
| 2896        | <i>Mandrillus sphinx</i>    | Campo Melen     | CP-ML     | 04/02/2008      | +     | +   | KJ420662    |             |            |
| 2898        | <i>Mandrillus sphinx</i>    | Campo Melen     | CP-ML     | 04/02/2008      | +     | +   | KJ420663    |             |            |
| 2899        | <i>Mandrillus sphinx</i>    | Campo Melen     | CP-ML     | 04/02/2008      | +     | +   | KJ420664    |             |            |
| 2900        | <i>Mandrillus sphinx</i>    | Campo Melen     | CP-ML     | 04/02/2008      | +     | +   | KJ420665    |             |            |
| 2902        | <i>Mandrillus sphinx</i>    | Campo Melen     | CP-ML     | 04/02/2008      | +     | +   | KJ420666    | KJ420727    |            |
| 2903        | <i>Mandrillus sphinx</i>    | Campo Oveng     | CP-OV     | 02/05/2008      | +     | +   | KJ420672    | KJ420740    |            |
| 2904        | <i>Mandrillus sphinx</i>    | Campo Melen     | CP-ML     | 04/02/2008      | +     | +   | KJ420667    |             |            |
| 2906        | <i>Mandrillus sphinx</i>    | Campo Melen     | CP-ML     | 04/02/2008      | +     | -   |             |             |            |
| 2907        | <i>Mandrillus sphinx</i>    | Campo Melen     | CP-ML     | 04/02/2008      | +     | +   | KJ420668    | KJ420719    |            |
| 2908        | <i>Mandrillus sphinx</i>    | Campo Melen     | CP-ML     | 04/02/2008      | +     | +   | KJ420669    | KJ420728    |            |
| 2909        | <i>Mandrillus sphinx</i>    | Campo Melen     | CP-ML     | 04/02/2008      | +     | +   | KJ420670    |             |            |
| 2910        | <i>Mandrillus sphinx</i>    | Campo Melen     | CP-ML     | 04/02/2008      | +     | +   | KJ420671    |             |            |

|      |                             |             |       |            |   |   |          |          |
|------|-----------------------------|-------------|-------|------------|---|---|----------|----------|
| 2911 | <i>Mandrillus sphinx</i>    | Campo Melen | CP-ML | 04/02/2008 | - |   |          |          |
| 3330 | <i>Mandrillus sphinx</i>    | Campo Oveng | CP-OV | 30/04/2008 | - |   |          |          |
| 3333 | <i>Mandrillus sphinx</i>    | Campo Oveng | CP-OV | 23/05/2008 | + | + | KJ420673 |          |
| 3334 | <i>Mandrillus sphinx</i>    | Campo Oveng | CP-OV | 23/05/2008 | + | + | KJ420674 | KJ420745 |
| 3335 | <i>Mandrillus sphinx</i>    | Campo Oveng | CP-OV | 23/05/2008 | + | - |          |          |
| 3336 | <i>Mandrillus sphinx</i>    | Campo Oveng | CP-OV | 23/05/2008 | + | + | KJ420675 | KJ420743 |
| 3337 | <i>Mandrillus sphinx</i>    | Campo Oveng | CP-OV | 23/05/2008 | + | + | KJ420676 |          |
| 3338 | <i>Cercocebus torquatus</i> | Campo Oveng | CP-OV | 28/05/2008 | + | - |          |          |
| 3339 | <i>Cercocebus torquatus</i> | Campo Oveng | CP-OV | 28/05/2008 | + | - |          |          |
| 3340 | <i>Cercocebus torquatus</i> | Campo Oveng | CP-OV | 28/05/2008 | + | + | KJ420677 |          |
| 3341 | <i>Cercocebus torquatus</i> | Campo Oveng | CP-OV | 28/05/2008 | + | - |          |          |
| 3342 | <i>Cercocebus torquatus</i> | Campo Oveng | CP-OV | 28/05/2008 | + | + | KJ420678 |          |
| 3343 | <i>Mandrillus sphinx</i>    | Campo Oveng | CP-OV | 11/11/2007 | + | + | KJ420679 |          |
| 3344 | <i>Mandrillus sphinx</i>    | Campo Oveng | CP-OV | 11/11/2007 | + | + | KJ420680 | KJ420732 |
| 3345 | <i>Mandrillus sphinx</i>    | Campo Oveng | CP-OV | 11/11/2007 | + | + | KJ420626 | KJ420729 |
| 3346 | <i>Mandrillus sphinx</i>    | Campo Oveng | CP-OV | 11/11/2007 | + | + | KJ420681 |          |
| 3347 | <i>Mandrillus sphinx</i>    | Campo Oveng | CP-OV | 11/11/2007 | + | + | KJ420682 |          |
| 3348 | <i>Mandrillus sphinx</i>    | Campo Oveng | CP-OV | 11/11/2007 | + | + | NA       | KJ420722 |
| 3349 | <i>Mandrillus sphinx</i>    | Campo Oveng | CP-OV | 11/11/2007 | + | + | KJ420625 |          |
| 3350 | <i>Cercopithecus cephus</i> | Campo Melen | CP-ML | 15/12/2007 | + | + | KJ420684 |          |
| 3351 | <i>Mandrillus sphinx</i>    | Campo Oveng | CP-OV | 12/11/2007 | + | + | KJ420683 |          |
| 3356 | <i>Cercopithecus cephus</i> | Campo Melen | CP-ML | 15/12/2007 | - |   |          |          |
| 3357 | <i>Mandrillus sphinx</i>    | Campo Melen | CP-ML | 15/12/2007 | + | + | KJ420685 |          |
| 3958 | <i>Cercopithecus cephus</i> | Campo Melen | CP-ML | 03/02/2008 | - |   |          |          |
| 3959 | <i>Mandrillus sphinx</i>    | Campo Melen | CP-ML | 04/02/2008 | + | + | KJ420686 |          |
| 3960 | <i>Mandrillus sphinx</i>    | Campo Melen | CP-ML | 04/02/2008 | + | + | KJ420687 |          |
| 3961 | <i>Mandrillus sphinx</i>    | Campo Melen | CP-ML | 04/02/2008 | + | + |          | KJ420748 |
| 3962 | <i>Mandrillus sphinx</i>    | Campo Melen | CP-ML | 04/02/2008 | + | + | KJ420626 | KJ420741 |
| 1961 | <i>Mandrillus sphinx</i>    | Lomie       | LM    | 27/11/2006 | + | - |          |          |
| 3957 | <i>Cercopithecus cephus</i> | Campo Melen | CP-ML | 03/02/2008 | + | + | KJ420688 |          |
| 4136 | <i>Mandrillus sphinx</i>    | Djoum       | DJ    | 04/04/2009 | + | - |          |          |
| 4137 | <i>Mandrillus sphinx</i>    | Djoum       | DJ    | 04/04/2009 | + | + | KJ420692 |          |
| 4138 | <i>Mandrillus sphinx</i>    | Djoum       | DJ    | 04/04/2009 | + | + | KJ420693 |          |
| 4139 | <i>Mandrillus sphinx</i>    | Djoum       | DJ    | 04/04/2009 | + | + | KJ420694 |          |
| 4140 | <i>Mandrillus sphinx</i>    | Djoum       | DJ    | 09/04/2009 | + | + |          | KJ420723 |
| 4141 | <i>Mandrillus sphinx</i>    | Djoum       | DJ    | 09/04/2009 | + | + | KJ420689 | KJ420733 |
| 4142 | <i>Mandrillus sphinx</i>    | Djoum       | DJ    | 09/04/2009 | + | + | KJ420690 | KJ420734 |
| 4143 | <i>Mandrillus sphinx</i>    | Djoum       | DJ    | 09/04/2009 | + | + | KJ420691 | KJ420735 |
| 4144 | <i>Mandrillus sphinx</i>    | Djoum       | DJ    | 09/04/2009 | + | + | KJ420695 | KJ420736 |

|      |                          |               |       |            |   |   |          |          |
|------|--------------------------|---------------|-------|------------|---|---|----------|----------|
| 5879 | <i>Mandrillus sphinx</i> | Ekom          | EK    | 05/06/2010 | + | + | KJ420628 | KJ420742 |
| 8096 | <i>Mandrillus sphinx</i> | Campo Melen   | CP-ML | 04/02/2008 | + | + | KJ420633 |          |
| 7033 | <i>Mandrillus sphinx</i> | Campo Grottes | CP-GR | 26/11/2011 | + | + | KJ420629 | KJ420711 |
| 7034 | <i>Mandrillus sphinx</i> | Campo Grottes | CP-GR | 26/11/2011 | + | - |          |          |
| 7120 | <i>Mandrillus sphinx</i> | Campo Mvini   | CP-MV | 09/12/2011 | + | + | KJ420696 |          |
| 7921 | <i>Mandrillus sphinx</i> | Campo Grottes | CP-GR | 26/01/2012 | + | + | KJ420630 |          |
| 7922 | <i>Mandrillus sphinx</i> | Campo Grottes | CP-GR | 26/01/2012 | + | + | KJ420697 |          |
| 8090 | <i>Mandrillus sphinx</i> | Campo Melen   | CP-ML | 04/02/2008 | + | + | KJ420698 |          |
| 8091 | <i>Mandrillus sphinx</i> | Campo Melen   | CP-ML | 04/02/2008 | + | - |          |          |
| 8092 | <i>Mandrillus sphinx</i> | Campo Melen   | CP-ML | 04/02/2008 | + | + | KJ420699 |          |
| 8093 | <i>Mandrillus sphinx</i> | Campo Melen   | CP-ML | 04/02/2008 | + | + | KJ420631 |          |
| 8094 | <i>Mandrillus sphinx</i> | Campo Melen   | CP-ML | 04/02/2008 | + | + | KJ420632 |          |
| 8095 | <i>Mandrillus sphinx</i> | Campo Melen   | CP-ML | 04/02/2008 | + | + | NA       | KJ420713 |
| 8097 | <i>Mandrillus sphinx</i> | Campo Melen   | CP-ML | 04/02/2008 | + | + | NA       | KJ420714 |
| 8098 | <i>Mandrillus sphinx</i> | Campo Melen   | CP-ML | 04/02/2008 | + | + | KJ420634 | KJ420724 |
| 8099 | <i>Mandrillus sphinx</i> | Campo Melen   | CP-ML | 04/02/2008 | + | + | KJ420700 |          |
| 8100 | <i>Mandrillus sphinx</i> | Campo Melen   | CP-ML | 04/02/2008 | + | + | KJ420635 |          |
| 8101 | <i>Mandrillus sphinx</i> | Campo Melen   | CP-ML | 04/02/2008 | + | + | KJ420701 |          |
| 8102 | <i>Mandrillus sphinx</i> | Campo Melen   | CP-ML | 04/02/2008 | + | + | KJ420702 |          |
| 8103 | <i>Mandrillus sphinx</i> | Campo Melen   | CP-ML | 04/02/2008 | + | + | KJ420703 |          |
| 8104 | <i>Mandrillus sphinx</i> | Campo Melen   | CP-ML | 04/02/2008 | + | + | KJ420704 |          |
| 8105 | <i>Mandrillus sphinx</i> | Campo Melen   | CP-ML | 04/02/2008 | + | + | KJ420636 |          |
| 8106 | <i>Mandrillus sphinx</i> | Campo Melen   | CP-ML | 04/02/2008 | + | + | KJ420637 |          |
| 8107 | <i>Mandrillus sphinx</i> | Campo Melen   | CP-ML | 04/02/2008 | + | + | NA       | KJ420715 |
| 8108 | <i>Mandrillus sphinx</i> | Campo Melen   | CP-ML | 04/02/2008 | + | + | KJ420638 | KJ420712 |
| 8109 | <i>Mandrillus sphinx</i> | Campo Melen   | CP-ML | 04/02/2008 | + | + |          | KJ420749 |
| 8110 | <i>Mandrillus sphinx</i> | Campo Melen   | CP-ML | 04/02/2008 | + | + | KJ420705 |          |
| 8111 | <i>Mandrillus sphinx</i> | Campo Melen   | CP-ML | 04/02/2008 | + | + | KJ420706 | KJ420730 |
| 8112 | <i>Mandrillus sphinx</i> | Campo Melen   | CP-ML | 04/02/2008 | + | - |          |          |
| 8113 | <i>Mandrillus sphinx</i> | Campo Melen   | CP-ML | 04/02/2008 | + | + | KJ420639 |          |
| 8114 | <i>Mandrillus sphinx</i> | Campo Melen   | CP-ML | 04/02/2008 | + | + | KJ420707 |          |
| 8115 | <i>Mandrillus sphinx</i> | Campo Melen   | CP-ML | 04/02/2008 | + | + | KJ420708 |          |
| 8116 | <i>Mandrillus sphinx</i> | Campo Melen   | CP-ML | 04/02/2008 | + | + | KJ420709 |          |
| 8117 | <i>Mandrillus sphinx</i> | Campo Melen   | CP-ML | 04/02/2008 | + | + | KJ420640 |          |
| 8118 | <i>Mandrillus sphinx</i> | Campo Melen   | CP-ML | 04/02/2008 | + | + | KJ420641 | KJ420731 |
| 8119 | <i>Mandrillus sphinx</i> | Campo Melen   | CP-ML | 04/02/2008 | + | + | KJ420642 |          |
| 8120 | <i>Mandrillus sphinx</i> | Campo Melen   | CP-ML | 04/02/2008 | + | + |          | KJ420716 |
| 8121 | <i>Mandrillus sphinx</i> | Campo Melen   | CP-ML | 04/02/2008 | + | + | KJ420643 | KJ420717 |
| 8122 | <i>Mandrillus sphinx</i> | Campo Melen   | CP-ML | 04/02/2008 | + | + | KJ420644 | KJ420725 |

|      |                             |             |            |   |   |          |
|------|-----------------------------|-------------|------------|---|---|----------|
| 8124 | <i>Mandrillus sphinx</i>    | Campo Melen | 04/02/2008 | + | - |          |
| 8125 | <i>Mandrillus sphinx</i>    | Campo Melen | 04/02/2008 | + | + | KJ420647 |
| 8127 | <i>Cercocebus torquatus</i> | Campo Melen | 04/02/2008 | + | + | KJ420710 |

TABLE S3 -PRIMER SEQUENCES

## A) Screening and typing of EVs.

| Primer name <sup>1</sup> | Sequence                      | Reference                |
|--------------------------|-------------------------------|--------------------------|
| HEV_5'UTR_309s           | TGTAGHTYWGGTCGATGAGTC         | Wisdom et al.<br>(2009)  |
| HEV_5'UTR_563ias         | ACACCCAAAGTAGTYGGTYCCR        |                          |
| HEV_5'UTR_573oas         | RGAAACACGGACACCCAAAGTAGT      |                          |
| HRV/HEV_VP4_458os        | CCGGCCCCTGAATGYGGCTAA         | Wisdom et al.<br>(2009)  |
| HRV/HEV_VP4_547is        | ACCRACACTTTGGGTGTCCGTG        |                          |
| HRV/HEV_VP4_1087ias      | TCWGGHARYTTCCAMCACCANCC       |                          |
| or HEVA_VP4_1178ias      | TCNNGRAAYTTCCARTACCANCC       |                          |
| or HEVB_VP4_1178ias      | TCNNGNARYTTCCACCACCANCC       |                          |
| HRV/HEV_VP4_1125oas      | ACATRTTYTSNCCAAANAYDCCCAT     |                          |
| SA5_VP1_2265os           | GTNCCNTGGATYAGYCARACMCAYTA    | Harvala et al.<br>(2011) |
| SA5_VP1_2325is           | GGNTAYATTACNTGYTGGTAYCARAC    |                          |
| SA5_VP1_3016ias          | CTGGGRTTNGTDGANGAYTGCCA       |                          |
| SA5_VP1_3043oas          | GGNGCRTTNCCYTCNGTCCARAA       |                          |
| SA5_VP1_2994os           | TGGCARTCNTCNACNAAYCCCAG       | Harvala et al.<br>(2011) |
| SA5_VP1_3021is           | TTNTGGACNGARGGNAAYGCNCC       |                          |
| SA5_VP1_3493ias          | AGGTCYCTRRTTVYARTCYTCCA       |                          |
| SA5_VP1_3610oas          | GGSCCYTGRAANGAVACNNGGTA       |                          |
| SA5_VP1_2606os           | CCAGCATTAAACWGCARCRGAAACWGG   |                          |
| SA5_VP1_2650is           | ACCAAGTGACACYRTRCAAACCAGG     |                          |
| SA5_VP1_3118ias          | CCACCCRTCATARAACRWRCTATACGC   |                          |
| SA5_VP1_3287oas          | TGGRTMCCAAGACCACCRGC          |                          |
| EVH_VP1_2190os           | GGCAATAGAGARGAGGCAATGCTRGG    | This study               |
| EVH_VP1_2337is           | CTTGTTYCAAACRAAYATGGTRGTTCC   |                          |
| EVH_VP1_3015ias          | GARGGRTTYGTYGARGATTGCCA       |                          |
| EVH_VP1_3080oas          | ATTRGCATTTGACACAAAAGGCAYKGA   |                          |
| EVH_VP1_2851os           | AYGTRCGCTTTGAYCTTGARGTSA      |                          |
| EVH_VP1_2994is           | TGGCAATCYTCRACRAAYCCYTC       |                          |
| EVH_VP1_3653ias          | TCTCTCAGGGTAGTAYTCGCTCGC      |                          |
| EVH_VP1_3666oas          | CGTGNGTTTGGTATCTCKCWGGRTAG    |                          |
| EVJ_VP1_2337s            | TGTGGTAYCARACAAAYTTTGTGRGTHCC | This study               |
| EVJ_VP1_3207ias          | CTGCAAARGAWCCCARCATRRTACTWGG  |                          |
| EVJ_VP1_3285oas          | GCACKCACRTGTTTKGSYTTTCATGTA   |                          |
| EVJ_VP1_2841os           | TGTTYACDTACATGAGRRTTGMTGC     | This study               |
| EVJ_VP1_2993is           | TGGCAATCWGGYACYAAYCCMTC       |                          |
| EVJ_VP1_3526as           | GTCACAMCCRTGKGCDDTGTG         |                          |

B) Amplification of complete genomes

| <u>Primer<sup>1</sup></u> | <u>Sequence</u>                               | <u>Region</u>  |
|---------------------------|-----------------------------------------------|----------------|
| <u>EVJ_1s</u>             | <u>CGC TTA AAA TAG CCT SWG GGT TGY TCC</u>    |                |
| <u>EVJ_440ias</u>         | <u>GCT CAR TAG GCT CTT CAC ACC ATG TC</u>     | <u>1-440</u>   |
| <u>EVJ_573oas</u>         | <u>RGAAACACGGACACCCAAAGTAGT</u>               |                |
| <u>EVJ-309s</u>           | <u>TGTAGHTYWGGTCGATGAGTC</u>                  |                |
| <u>EVJ_764ias</u>         | <u>TGT CKT GAM ACY TGT GCT CCC AT</u>         | <u>309-764</u> |
| <u>EVJ_891oas</u>         | <u>TGG GTC CTG GCT RAA RTC YTG TTT</u>        |                |
| <u>CPML8109_1039os</u>    | <u>ATT GTA GTA GGG TAY GGW GAR TGG C</u>      |                |
| <u>CPML8109_1096is</u>    | <u>GTG GAT AAA CCA ACC AAR CCH GAY GT</u>     |                |
| <u>CPML8109_2486ias</u>   | <u>GTC CCC TTG CAG TAC AGA TGC TT</u>         |                |
| <u>CPML8109_2583oas</u>   | <u>TGT GCC AAT GTT ATG GGA GGA TGC</u>        |                |
| <u>CPML3961_1041os</u>    | <u>GGT TGT GGC KTA YGG TGA RTG GC</u>         | <u>1096-</u>   |
| <u>CPML3961_1096is</u>    | <u>GTA GAT AAA CCA ACR MAR CCY GAY GT</u>     | <u>2400</u>    |
| <u>CPML3961_2496ias</u>   | <u>GCC TAC TGG RTC TCC TTG KAG AAY TG</u>     |                |
| <u>CPML3961_2579oas</u>   | <u>GCA ATG TTG TGY GTR CTT TCC ART G</u>      |                |
| <u>GR2815_1040os</u>      | <u>ATT GTT GTA GGG TAT GGT GAG TGG C</u>      |                |
| <u>GR2815_1096is</u>      | <u>GTG GAT AAA CCA ACC AAR CCH GAY GT</u>     |                |
| <u>GR2815_2402ias</u>     | <u>GCA ATT ATA TAT CCG TTG TTA GGT GCC CC</u> |                |
| <u>GR2815_2441oas</u>     | <u>TCA GCA AAC GGA CAC TAA AGT TGG G</u>      |                |
| <u>EVJ_3349os</u>         | <u>AAC AAC WGG RGY KTT TGG ACA ACA</u>        |                |
| <u>EVJ_3394is</u>         | <u>GGW GCM RTH TAT GTG GGT AAT TAC AGA</u>    |                |
| <u>EVJ_4826ias</u>        | <u>GTG CTC TGC TAT CTG ARA TGG TKG G</u>      |                |
| <u>EVJ_4956oas</u>        | <u>CAG KGT TTG AAR TTY GCT GGR TCA CA</u>     |                |
| <u>EVJ_4447os</u>         | <u>CGT ACA GTT CAA GTC CAA ATG CCG C</u>      |                |
| <u>EVJ_4692is</u>         | <u>GGT GTC YAG TGT TGA YTT YGT GCC A</u>      | <u>4692-</u>   |
| <u>EVJ_6097ias</u>        | <u>CGG GTT CCT TCA CAC CTT CAA AGA T</u>      | <u>6097</u>    |
| <u>EVJ_6134oas</u>        | <u>TCC WCC TTG AGT CTG GGG TCT TTC</u>        |                |
| <u>EVJ_5825os</u>         | <u>CAC AGG ATG YTH ATG TAY AAY TTY CCM AC</u> |                |
| <u>EVJ_5907is</u>         | <u>TTC ATG TTG GWG GYA ATG GRC AYC</u>        | <u>5907-</u>   |
| <u>EVJ_7466a</u>          | <u>CAC TCT GGT TGT GCT AAA TTT WCC CCT G</u>  | <u>7466</u>    |

<sup>1</sup>Primers were named using a combination of target species, region, position (numbered according to the poliovirus Leon serotype 3 sequence, accession number K01392) and orientation (s, sense; a, antisense; os, outer sense; is, inner sense; oas, outer antisense; ias, inner antisense). Primer sets are separated by dashed lines.

FIGURE S1

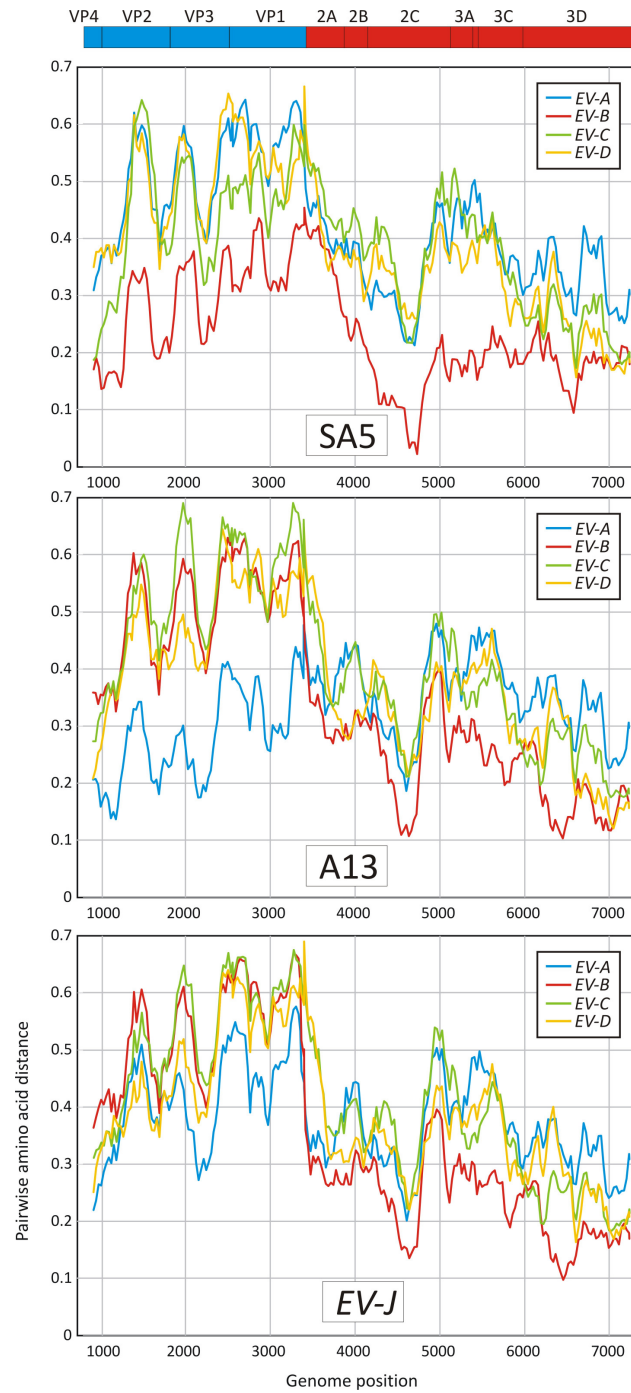

Divergence between primate viruses SA5, A13 and EV-J and human sequences within species A-D. Plots were generated as described for Fig. 5.



FIGURE S2

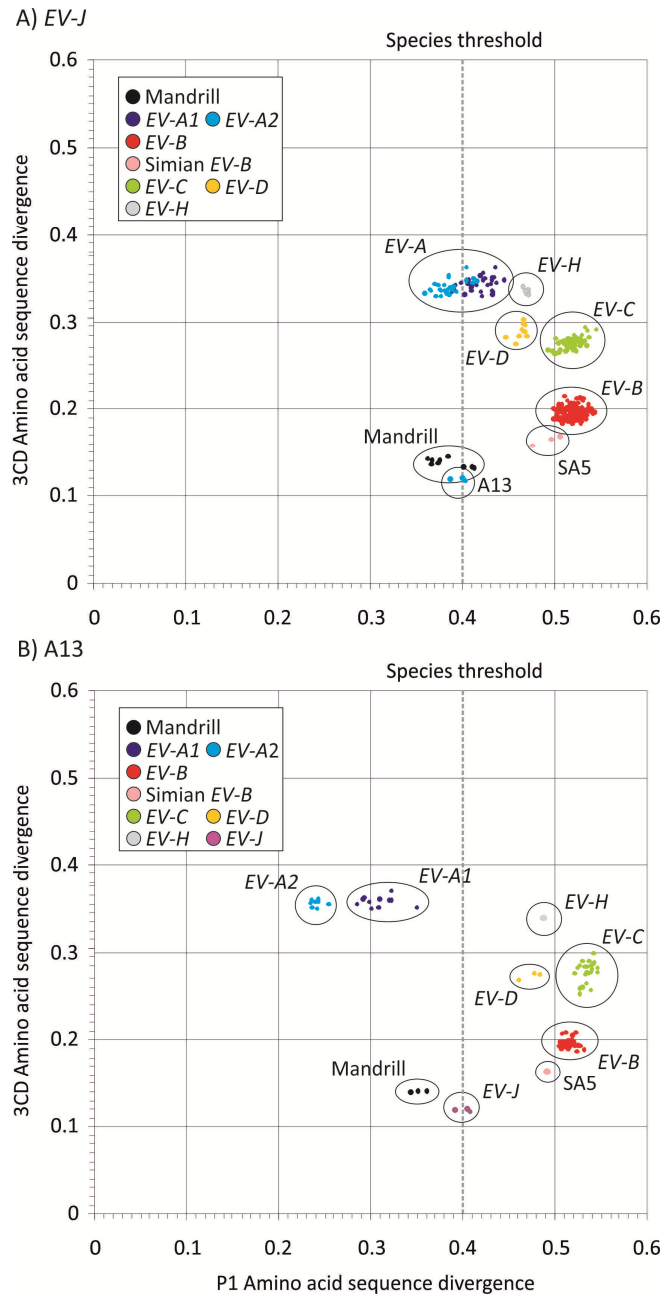

Comparison of pairwise amino acid distances in P1 (positions 743-3376) and 3CD regions (positions 5429-7360) between (A) *EV-J* and (B) *A13*, with mandrill viruses and EV species A-D, *EV-J* and *EV-H*. See legend to Fig. 4 for further information.

FIGURE S3

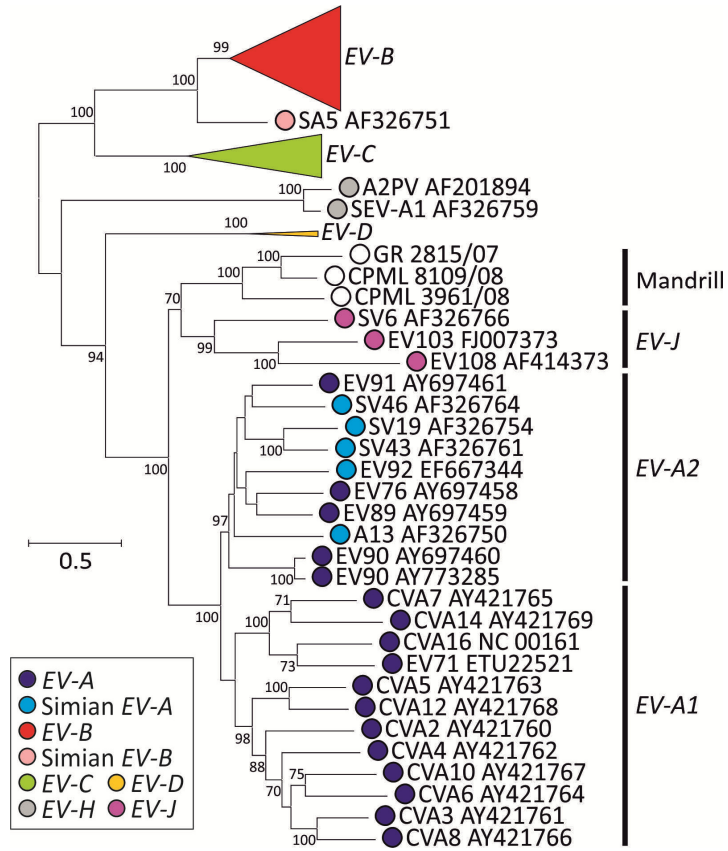

Phylogenetic analysis of the P1 region of EV-A to -D, -H, -J and mandrill viruses. Using the whole dataset, bootstrap support exists for EV-A, EV-J and mandrill variants individually but also for their combined grouping.
